# Supplementary material for: Periodontitis as a possible early sign of diabetes mellitus
Source: PubMed Central journal article supplement — BMJ Open Diabetes Res Care. 2017 Jan 19;5(1):e000326. doi: 10.1136/bmjdrc-2016-000326 (PMC5337701; doi:10.1136/bmjdrc-2016-000326), 2017-01-19

**Supplemental Figure 1** *Clinical and Laboratory Standards Institute (CLSI) EP9 method comparison for HbA1c in blood collected on Whatman 903 paper and EDTA-blood collected by venipuncture*

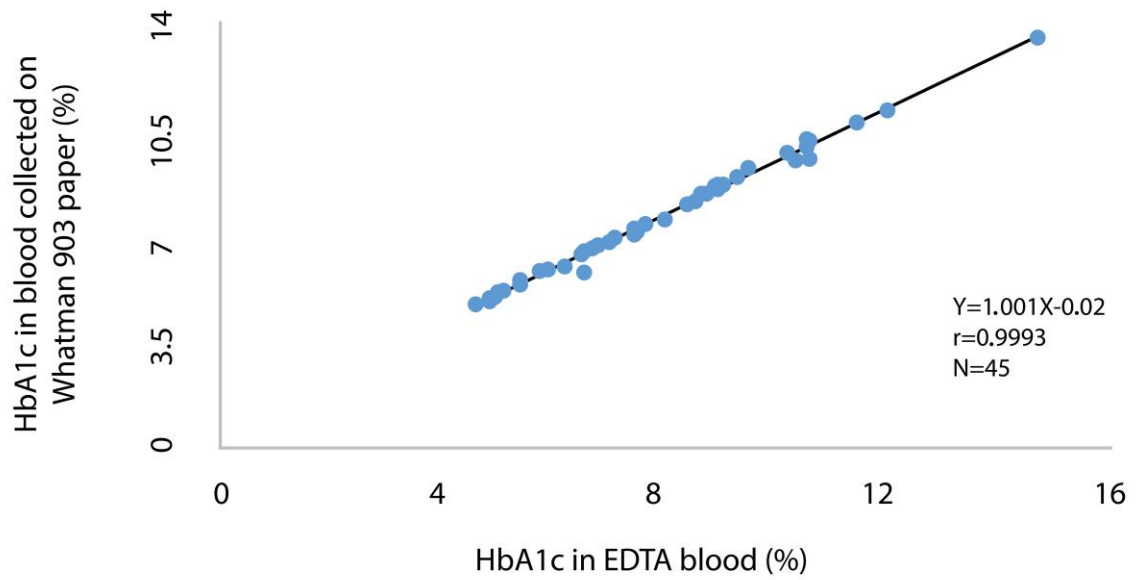

Supplement: bmjdrc-2016-000326supp_figure.pdf [file bmjdrc-2016-000326supp_figure.pdf]
